# Supplementary material
Source: publisher figshare collection journal article supplement (https://gsapubs.figshare.com/ndownloader/files/22411896)

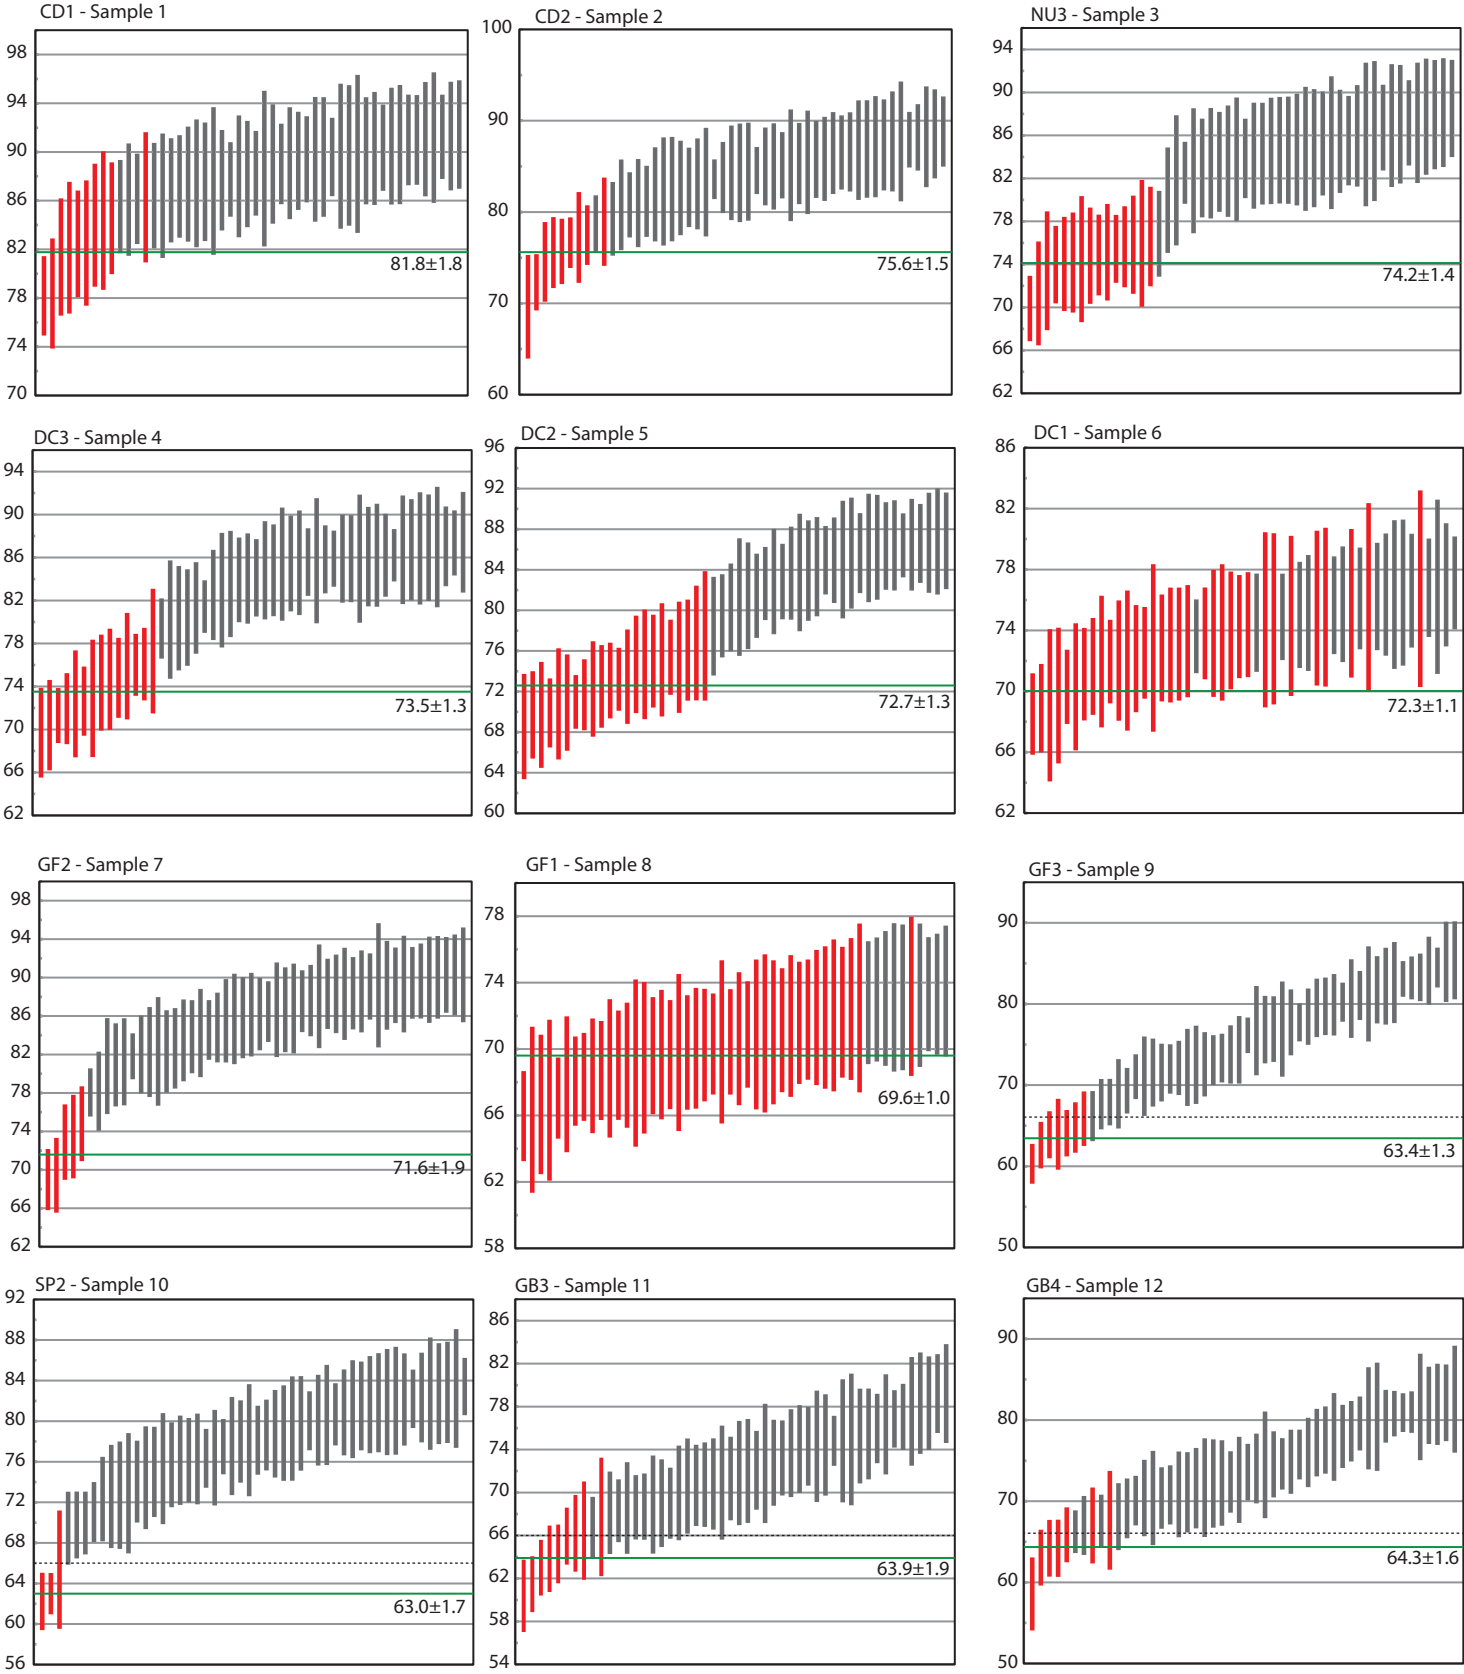

Grain used in MDA weighted average calculation

Supplement: Supplementary file 1 [file 22411896]
